# Supplementary material for: A High-Efficiency Deep Blue Emitter for OLEDs with a New Dual-Core Structure Incorporating ETL Characteristics
Source: MDPI journal article supplement (doi:10.3390/molecules28227485), 2023-11-08
Supplement: s1 [file s1]

## Supporting information

### A High-Efficiency Deep Blue Emitter for OLEDs with a New Dual-Core Structure Incorporating ETL Characteristics

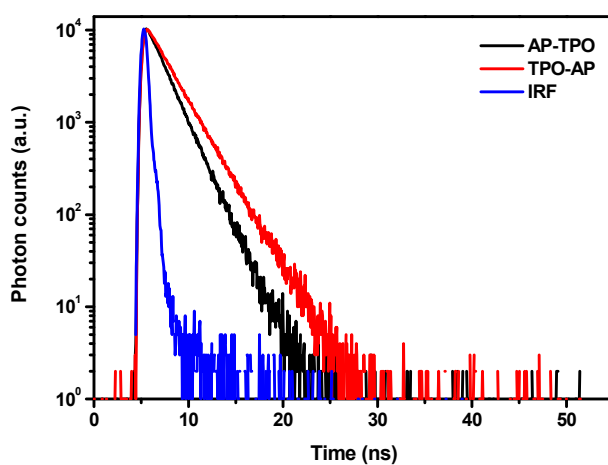

Figure S1. TRPL curves of AP-TPO and TPO-AP.

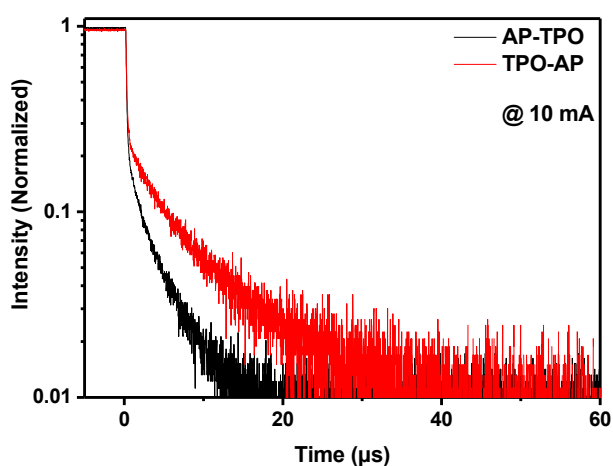

Figure S2. Transient EL responses of AP-TPO and TPO-AP.

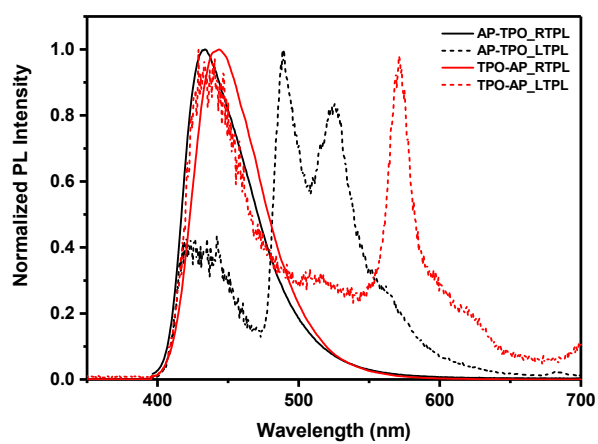

**Figure S3.** RTPL and LTPL (77K) in solution state AP-TPO and TPO-AP.

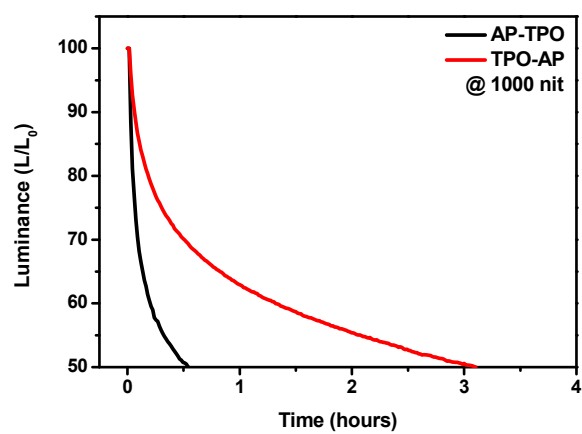

**Figure S4.** Device lifetime at 1000 nits of AP-TPO and TPO-AP.



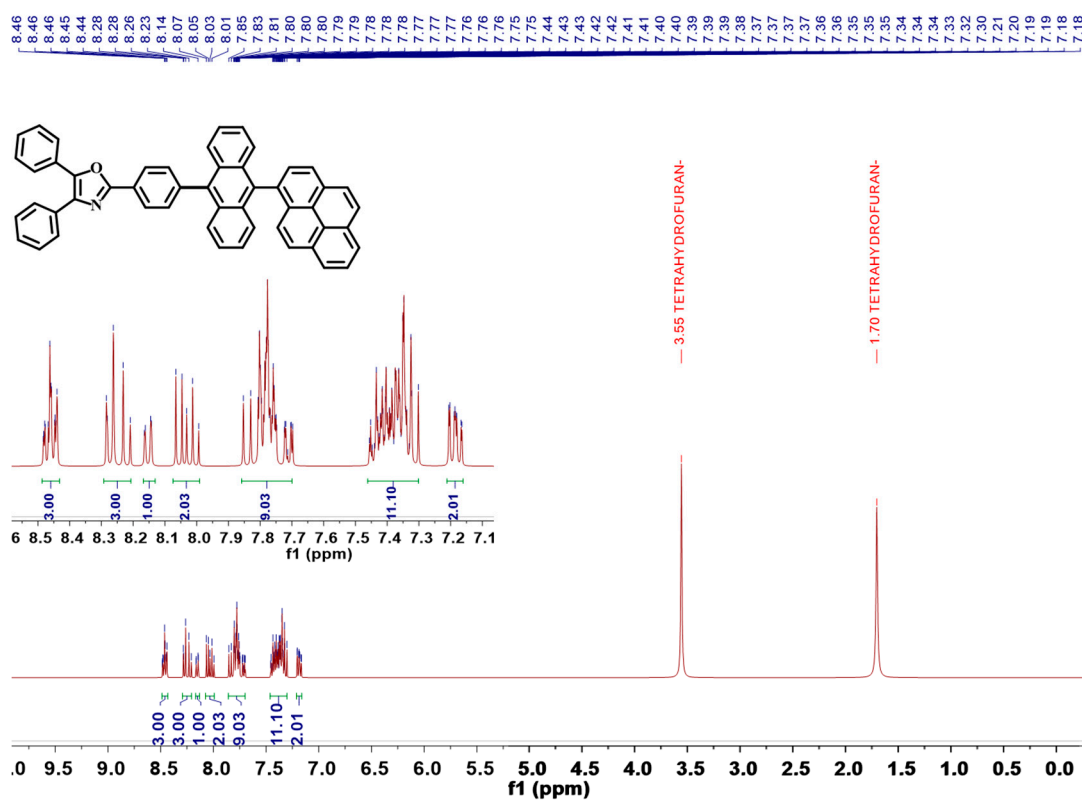

Figure S7. <sup>1</sup>H NMR spectra of compound (6) in THF.

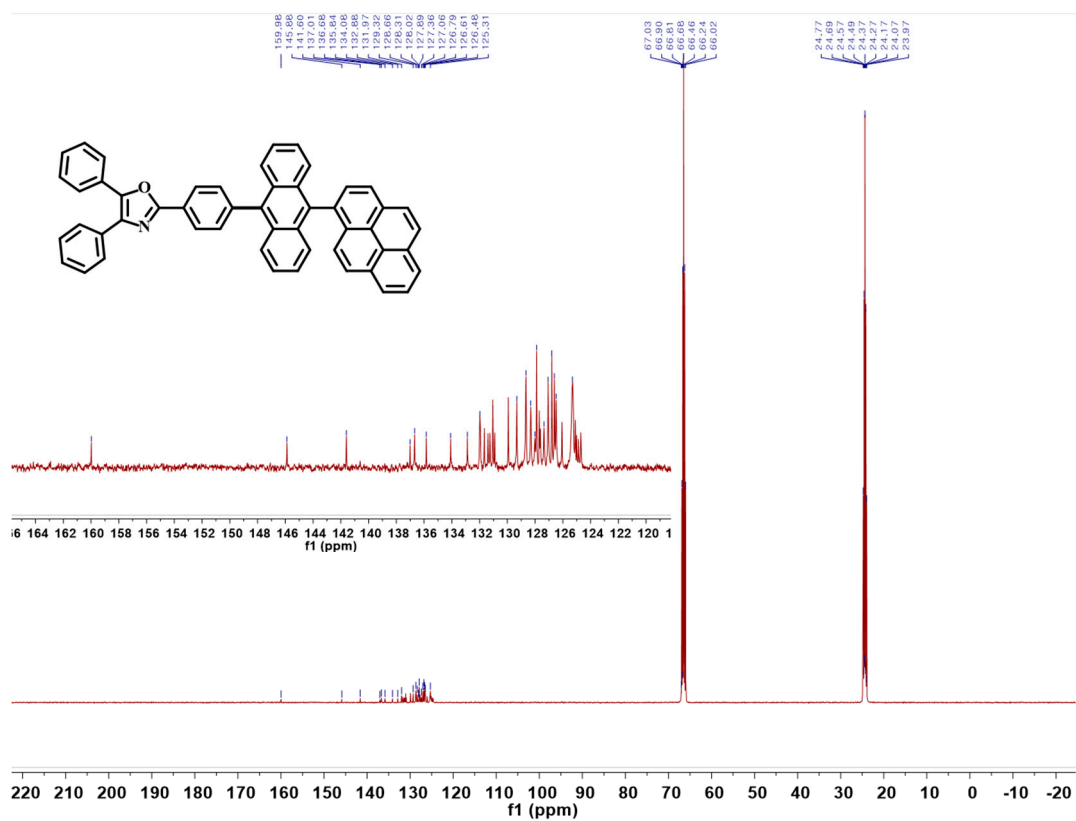

Figure S8. <sup>13</sup>C NMR spectra of compound (6) in THF.
